# Supplementary material
Source: PubMed Central journal article supplement (PMC5871922)
Supplement: NIHMS928798-supplement-Supp_FigS1.pdf [file NIHMS928798-supplement-Supp_FigS1.pdf]

This document contains detailed contact prediction accuracy of our methods and a few others.

**RX\_submit** Represents contact predictions submitted to CASP12 by RaptorX\_Contact group  
A variety of deep models were trained during the CASP12 season.  
The uniprot sequence database dated in 2015 and Feb 2016 were used to generate MSA.

**RX\_postdict** Represents our deep learning method trained right after CASP12.  
This deep model was trained between August and September 2016 and  
still uses the uniprot20 sequence database dated in February 2016 to build MSA.

**metaPSICOV** The latest version released on Sep 27, 2016.  
MetaPSICOV and CCMpred are run locally to generate their contact predictions.

The predictions of Baker\_GREMLIN and MetaPSICOV\_submit are downloaded from CASP12 website.

For a fair comparison, we use the same MSAs for CCMpred, metaPSICOV, and RX\_postdict.  
These MSAs were built locally by running Hhblits with a uniprot database dated in Feb 2016.

**Note:**

The top L/k (k=1,2, 5, 10) is calculated by the number of correctly-predicted contacts among  
top L/k predictions divided by L/k even if when one target has no L/k native contacts.

| LONG-RANGE targets | len | meff   | CCMpred |       |        |        | Baker GREMLIN |       |       |        | MetaPSICOV submit |       |        |        | MetaPSICOV |       |        |        | RX_submit |       |        |        | RX_postdict |       |        |        |
|--------------------|-----|--------|---------|-------|--------|--------|---------------|-------|-------|--------|-------------------|-------|--------|--------|------------|-------|--------|--------|-----------|-------|--------|--------|-------------|-------|--------|--------|
|                    |     |        | L       | L/2   | L/5    | L/10   | L             | L/2   | L/5   | L/10   | L                 | L/2   | L/5    | L/10   | L          | L/2   | L/5    | L/10   | L         | L/2   | L/5    | L/10   | L           | L/2   | L/5    | L/10   |
| T0859-D1           | 113 | 1.0    | 0.88    | 0.00  | 0.00   | 0.00   | 10.62         | 14.29 | 0.00  | 0.00   | 0.00              | 0.00  | 0.00   | 0.00   | 0.00       | 0.00  | 0.00   | 1.77   | 0.00      | 0.00  | 0.00   | 1.77   | 3.57        | 4.55  | 9.09   |        |
| T0862-D1           | 93  | 22.3   | 5.38    | 8.70  | 5.56   | 11.11  | 2.15          | 0.00  | 0.00  | 0.00   | 12.90             | 10.87 | 22.22  | 33.33  | 16.13      | 15.22 | 33.33  | 44.44  | 18.28     | 30.43 | 38.89  | 55.56  | 24.73       | 23.91 | 38.89  | 44.44  |
| T0863-D1           | 193 | 52.0   | 3.63    | 6.25  | 5.26   | 0.00   | 3.63          | 4.17  | 2.63  | 5.26   | 8.29              | 13.54 | 13.16  | 5.26   | 3.63       | 3.13  | 2.63   | 5.26   | 9.33      | 17.71 | 28.95  | 26.32  | 25.91       | 37.50 | 50.00  | 68.42  |
| T0863-D2           | 356 | 74.5   | 0.56    | 0.56  | 0.00   | 0.00   | 0.84          | 1.12  | 2.82  | 5.71   | 3.09              | 3.93  | 7.04   | 2.86   | 2.53       | 2.81  | 2.82   | 0.00   | 6.46      | 12.92 | 23.94  | 31.43  | 13.20       | 19.10 | 35.21  | 54.29  |
| T0864-D1           | 246 | 209.1  | 20.33   | 27.64 | 48.98  | 58.33  | 19.92         | 30.89 | 51.02 | 66.67  | 36.18             | 53.66 | 65.31  | 87.50  | 33.33      | 43.90 | 67.35  | 75.00  | 40.65     | 62.60 | 79.59  | 87.50  | 69.11       | 85.37 | 100.00 | 100.00 |
| T0866-D1           | 104 | 3383.6 | 57.69   | 88.46 | 100.00 | 100.00 | 50.96         | 76.92 | 95.00 | 90.00  | 73.08             | 96.15 | 100.00 | 100.00 | 72.12      | 90.38 | 100.00 | 100.00 | 75.00     | 84.62 | 95.00  | 100.00 | 84.62       | 94.23 | 95.00  | 100.00 |
| T0869-D1           | 104 | 19.0   | 10.58   | 11.54 | 20.00  | 40.00  | 12.50         | 13.46 | 20.00 | 30.00  | 23.08             | 30.77 | 50.00  | 60.00  | 29.81      | 40.38 | 35.00  | 50.00  | 24.04     | 36.54 | 55.00  | 70.00  | 48.08       | 59.62 | 70.00  | 80.00  |
| T0870-D1           | 123 | 58.2   | 6.50    | 8.20  | 0.00   | 0.00   | 8.94          | 6.56  | 4.17  | 0.00   | 13.01             | 14.75 | 8.33   | 16.67  | 9.76       | 9.84  | 12.50  | 16.67  | 9.76      | 11.48 | 12.50  | 0.00   | 30.08       | 44.26 | 41.67  | 33.33  |
| T0878-D1           | 344 | 258.2  | 12.21   | 19.19 | 29.41  | 38.24  | 17.73         | 25.58 | 42.65 | 52.94  | 25.00             | 31.40 | 42.65  | 55.88  | 16.86      | 21.51 | 36.76  | 44.12  | 21.22     | 22.67 | 22.06  | 29.41  | 35.17       | 45.93 | 67.65  | 85.29  |
| T0880-D2           | 157 | 1.0    | 2.55    | 3.85  | 9.68   | 6.67   | 5.10          | 6.41  | 0.00  | 0.00   | 14.65             | 16.67 | 22.58  | 26.67  | 13.38      | 17.95 | 29.03  | 46.67  | 12.74     | 15.38 | 19.35  | 13.33  | 49.68       | 60.26 | 67.74  | 60.00  |
| T0886-D1           | 69  | 833.4  | 34.78   | 58.82 | 61.54  | 66.67  | 43.48         | 67.65 | 69.23 | 66.67  | 76.81             | 82.35 | 100.00 | 100.00 | 52.17      | 61.76 | 69.23  | 50.00  | 72.46     | 88.24 | 100.00 | 100.00 | 71.01       | 79.41 | 100.00 | 100.00 |
| T0886-D2           | 127 | 821.0  | 25.98   | 41.27 | 60.00  | 83.33  | 30.71         | 61.90 | 88.00 | 91.67  | 70.08             | 90.48 | 100.00 | 100.00 | 46.46      | 49.21 | 80.00  | 91.67  | 64.57     | 82.54 | 92.00  | 100.00 | 81.89       | 98.41 | 100.00 | 100.00 |
| T0888-D1           | 121 | 1.0    | 3.31    | 3.33  | 4.17   | 0.00   | 5.79          | 0.00  | 0.00  | 0.00   | 7.44              | 8.33  | 4.17   | 0.00   | 14.88      | 16.67 | 12.50  | 16.67  | 15.70     | 16.67 | 25.00  | 25.00  | 9.92        | 10.00 | 4.17   | 0.00   |
| T0890-D2           | 106 | 23.5   | 5.66    | 3.77  | 4.76   | 10.00  | 3.77          | 5.66  | 4.76  | 10.00  | 10.38             | 15.09 | 9.52   | 0.00   | 15.09      | 15.09 | 9.52   | 10.00  | 14.15     | 16.98 | 19.05  | 30.00  | 20.75       | 18.87 | 14.29  | 20.00  |
| T0892-D2           | 110 | 159.5  | 14.55   | 23.64 | 31.82  | 36.36  | 14.55         | 27.27 | 22.73 | 27.27  | 39.09             | 49.09 | 63.64  | 90.91  | 39.09      | 54.55 | 77.27  | 72.73  | 45.45     | 52.73 | 72.73  | 72.73  | 52.73       | 78.18 | 95.45  | 100.00 |
| T0894-D1           | 89  | 83.4   | 13.48   | 15.91 | 29.41  | 37.50  | 14.61         | 25.00 | 11.76 | 25.00  | 16.85             | 13.64 | 0.00   | 0.00   | 14.61      | 22.73 | 41.18  | 62.50  | 14.61     | 9.09  | 5.88   | 12.50  | 35.96       | 43.18 | 35.29  | 37.50  |
| T0896-D3           | 161 | 7.0    | 4.97    | 6.25  | 3.13   | 0.00   | 0.62          | 1.25  | 3.13  | 6.25   | 3.73              | 2.50  | 3.13   | 0.00   | 11.18      | 13.75 | 21.88  | 18.75  | 8.07      | 5.00  | 0.00   | 0.00   | 19.88       | 21.25 | 3.13   | 0.00   |
| T0897-D2           | 138 | 19.3   | 5.07    | 4.35  | 3.70   | 0.00   | 2.90          | 0.00  | 0.00  | 0.00   | 3.62              | 4.35  | 3.70   | 0.00   | 13.04      | 14.49 | 11.11  | 7.69   | 7.25      | 5.80  | 11.11  | 23.08  | 5.80        | 7.25  | 3.70   | 0.00   |
| T0897-D2           | 124 | 27.3   | 7.26    | 9.68  | 12.50  | 16.67  | 1.61          | 3.23  | 4.17  | 0.00   | 5.65              | 9.68  | 16.67  | 8.33   | 12.10      | 19.35 | 20.83  | 16.67  | 7.26      | 8.06  | 12.50  | 8.33   | 16.94       | 19.35 | 16.67  | 33.33  |
| T0898-D1           | 106 | 30.0   | 6.60    | 7.55  | 0.00   | 0.00   | 0.94          | 1.89  | 0.00  | 0.00   | 16.98             | 22.64 | 23.81  | 10.00  | 14.15      | 20.75 | 14.29  | 20.00  | 17.92     | 24.53 | 33.33  | 20.00  | 34.91       | 45.28 | 57.14  | 60.00  |
| T0899-D1           | 259 | 1047.6 | 22.78   | 31.01 | 45.10  | 56.00  | 1.54          | 0.78  | 0.00  | 0.00   | 40.93             | 57.36 | 88.24  | 96.00  | 37.84      | 62.79 | 84.31  | 92.00  | 36.68     | 57.36 | 84.31  | 88.00  | 52.90       | 71.32 | 94.12  | 100.00 |
| T0899-D2           | 88  | 210.7  | 4.55    | 4.55  | 0.00   | 0.00   | 2.27          | 2.27  | 0.00  | 0.00   | 43.18             | 47.73 | 64.71  | 75.00  | 35.23      | 43.18 | 76.47  | 62.50  | 37.50     | 47.73 | 70.59  | 62.50  | 44.32       | 63.64 | 82.35  | 100.00 |
| T0900-D1           | 102 | 3.0    | 10.78   | 11.76 | 5.00   | 10.00  | 13.73         | 13.73 | 25.00 | 20.00  | 56.86             | 74.51 | 95.00  | 100.00 | 38.24      | 37.25 | 45.00  | 30.00  | 35.29     | 31.37 | 35.00  | 60.00  | 41.18       | 50.98 | 45.00  | 50.00  |
| T0901-D2           | 70  | 496.5  | 11.43   | 14.29 | 21.43  | 14.29  | 4.29          | 8.57  | 21.43 | 14.29  | 32.86             | 34.29 | 57.14  | 71.43  | 35.71      | 37.14 | 64.29  | 85.71  | 25.71     | 28.57 | 50.00  | 42.86  | 58.57       | 68.57 | 100.00 | 100.00 |
| T0904-D1           | 251 | 34.3   | 4.38    | 6.40  | 6.00   | 12.00  | 2.39          | 4.80  | 8.00  | 4.00   | 17.93             | 20.00 | 26.00  | 20.00  | 15.14      | 20.80 | 28.00  | 32.00  | 21.91     | 23.20 | 28.00  | 40.00  | 60.56       | 75.20 | 94.00  | 96.00  |
| T0905-D1           | 242 | 4967.3 | 41.32   | 52.07 | 60.42  | 58.33  | 19.42         | 31.40 | 45.83 | 54.17  | 63.22             | 77.69 | 93.75  | 91.67  | 56.61      | 75.21 | 93.75  | 100.00 | 57.02     | 76.86 | 95.83  | 100.00 | 67.36       | 82.64 | 95.83  | 100.00 |
| T0905-D2           | 66  | 341.1  | 6.06    | 12.12 | 0.00   | 0.00   | 13.64         | 21.21 | 38.46 | 33.33  | 33.33             | 45.45 | 69.23  | 100.00 | 43.94      | 39.39 | 61.54  | 100.00 | 39.39     | 48.48 | 76.92  | 83.33  | 62.12       | 72.73 | 100.00 | 100.00 |
| T0912-D3           | 103 | 619.7  | 12.62   | 17.65 | 15.00  | 10.00  | 4.85          | 9.80  | 25.00 | 50.00  | 28.16             | 27.45 | 45.00  | 70.00  | 15.53      | 27.45 | 35.00  | 50.00  | 28.16     | 43.14 | 75.00  | 100.00 | 45.63       | 66.67 | 80.00  | 90.00  |
| T0914-D1           | 158 | 43.3   | 3.16    | 1.27  | 0.00   | 0.00   | 0.00          | 0.00  | 0.00  | 0.00   | 3.16              | 5.06  | 3.23   | 6.67   | 6.96       | 7.59  | 16.13  | 6.67   | 11.39     | 18.99 | 35.48  | 46.67  | 14.56       | 24.05 | 35.48  | 53.33  |
| T0914-D2           | 162 | 20.0   | 3.70    | 2.47  | 6.25   | 6.25   | 0.00          | 0.00  | 0.00  | 0.00   | 8.02              | 11.11 | 15.63  | 12.50  | 8.64       | 11.11 | 6.25   | 12.50  | 9.88      | 14.81 | 15.63  | 25.00  | 11.73       | 13.58 | 18.75  | 25.00  |
| T0915-D1           | 154 | 17.0   | 6.49    | 5.19  | 0.00   | 0.00   | 3.25          | 5.19  | 0.00  | 0.00   | 20.78             | 23.38 | 36.67  | 40.00  | 17.53      | 24.68 | 46.67  | 53.33  | 23.38     | 31.17 | 40.00  | 66.67  | 37.66       | 48.05 | 50.00  | 46.67  |
| T0918-D1           | 108 | 2827.4 | 29.63   | 44.44 | 52.38  | 70.00  | 27.78         | 50.00 | 80.95 | 100.00 | 46.30             | 62.96 | 71.43  | 90.00  | 41.67      | 61.11 | 85.71  | 80.00  | 50.93     | 72.22 | 85.71  | 90.00  | 59.26       | 70.37 | 85.71  | 100.00 |
| T0918-D2           | 123 | 731.8  | 30.89   | 40.98 | 45.83  | 66.67  | 19.51         | 37.70 | 58.33 | 75.00  | 51.22             | 68.85 | 79.17  | 66.67  | 47.15      | 62.30 | 91.67  | 100.00 | 73.98     | 90.16 | 100.00 | 100.00 | 61.79       | 83.61 | 100.00 | 100.00 |
| T0918-D3           | 118 | 2853.2 | 26.27   | 37.29 | 60.87  | 90.91  | 29.66         | 45.76 | 56.52 | 72.73  | 40.68             | 57.63 | 86.96  | 81.82  | 38.14      | 57.63 | 82.61  | 81.82  | 52.54     | 74.58 | 82.61  | 81.82  | 50.00       | 64.41 | 78.26  | 90.91  |
| T0923-D1           | 286 | 6.0    | 2.10    | 3.50  | 8.77   | 3.57   | 2.10          | 3.50  | 8.77  | 10.71  | 10.84             | 11.19 | 12.28  | 10.71  | 15.03      | 16.08 | 14.04  | 14.29  | 13.29     | 18.18 | 19.30  | 10.71  | 20.28       | 27.97 | 22.81  | 25.00  |
| T0941-D1           | 341 | 2.0    | 0.59    | 0.00  | 0.00   | 0.00   | 0.00          | 0.00  | 0.00  | 0.00   | 4.69              | 5.88  | 8.82   | 5.88   | 4.69       | 5.29  | 1.47   | 2.94   | 4.40      | 4.12  | 1.47   | 2.94   | 4.11        | 3.53  | 1.47   | 2.94   |
| T0946-D1           | 80  | 123.7  | 18.75   | 15.00 | 25.00  | 37.50  | 20.00         | 27.50 | 68.75 | 87.50  | 42.50             | 57.50 | 62.50  | 87.50  | 26.25      | 35.00 | 31.25  | 25.00  | 51.25     | 62.50 | 87.50  | 100.00 | 62.50       | 75.00 | 93.75  | 100.00 |
| average            |     |        | 12.91   | 17.54 | 21.13  | 25.42  | 11.24         | 17.18 | 23.22 | 27.00  | 27.15             | 34.00 | 42.48  | 46.57  | 24.72      | 31.28 | 41.66  | 45.34  | 28.63     | 36.42 | 46.76  | 51.50  | 40.18       | 50.20 | 58.87  | 63.93  |

| MEDIUM-RANGE<br>targets | len | meff   | CCMpred |       |       |        | Baker GREMLIN |       |       |        | MetaPSICOV_submit |       |       |        | MetaPSICOV |       |       |        | RX_submit |       |       |        | RX_postdict |       |        |        |
|-------------------------|-----|--------|---------|-------|-------|--------|---------------|-------|-------|--------|-------------------|-------|-------|--------|------------|-------|-------|--------|-----------|-------|-------|--------|-------------|-------|--------|--------|
|                         |     |        | L       | L/2   | L/5   | L/10   | L             | L/2   | L/5   | L/10   | L                 | L/2   | L/5   | L/10   | L          | L/2   | L/5   | L/10   | L         | L/2   | L/5   | L/10   | L           | L/2   | L/5    | L/10   |
| T0859-D1                | 113 | 1.0    | 11.50   | 12.50 | 27.27 | 36.36  | 0.88          | 1.79  | 4.55  | 0.00   | 15.93             | 16.07 | 18.18 | 9.09   | 11.50      | 12.50 | 9.09  | 9.09   | 14.16     | 19.64 | 18.18 | 9.09   | 7.08        | 5.36  | 4.55   | 9.09   |
| T0862-D1                | 93  | 22.3   | 7.53    | 4.35  | 0.00  | 0.00   | 1.08          | 2.17  | 5.56  | 11.11  | 10.75             | 8.70  | 5.56  | 11.11  | 12.90      | 19.57 | 33.33 | 55.56  | 10.75     | 19.57 | 27.78 | 44.44  | 17.20       | 26.09 | 55.56  | 88.89  |
| T0863-D1                | 193 | 52.0   | 4.66    | 7.29  | 7.89  | 10.53  | 4.66          | 7.29  | 7.89  | 10.53  | 6.74              | 10.42 | 18.42 | 21.05  | 9.33       | 13.54 | 13.16 | 15.79  | 8.29      | 10.42 | 13.16 | 21.05  | 13.47       | 18.75 | 23.68  | 36.84  |
| T0863-D2                | 356 | 74.5   | 1.40    | 1.69  | 2.82  | 5.71   | 0.84          | 1.12  | 2.82  | 5.71   | 2.81              | 5.06  | 2.82  | 2.86   | 3.65       | 3.93  | 5.63  | 2.86   | 5.90      | 6.18  | 4.23  | 2.86   | 8.15        | 12.36 | 16.90  | 22.86  |
| T0864-D1                | 246 | 209.1  | 15.04   | 20.33 | 28.57 | 33.33  | 13.01         | 21.14 | 34.69 | 45.83  | 30.89             | 44.72 | 67.35 | 75.00  | 38.21      | 57.72 | 67.35 | 87.50  | 39.43     | 66.67 | 91.84 | 100.00 | 44.72       | 75.61 | 100.00 | 100.00 |
| T0866-D1                | 104 | 3383.6 | 30.77   | 57.69 | 90.00 | 100.00 | 25.96         | 42.31 | 95.00 | 100.00 | 46.15             | 76.92 | 95.00 | 100.00 | 48.08      | 76.92 | 95.00 | 100.00 | 49.04     | 78.85 | 95.00 | 90.00  | 49.04       | 92.31 | 100.00 | 100.00 |
| T0869-D1                | 104 | 19.0   | 5.77    | 5.77  | 15.00 | 20.00  | 2.88          | 5.77  | 5.00  | 0.00   | 12.50             | 19.23 | 20.00 | 30.00  | 11.54      | 15.38 | 20.00 | 30.00  | 14.42     | 21.15 | 30.00 | 40.00  | 24.04       | 38.46 | 55.00  | 40.00  |
| T0870-D1                | 123 | 58.2   | 5.69    | 6.56  | 16.67 | 25.00  | 4.07          | 8.20  | 16.67 | 25.00  | 15.45             | 19.67 | 37.50 | 50.00  | 14.63      | 14.75 | 25.00 | 50.00  | 13.01     | 13.11 | 25.00 | 33.33  | 21.14       | 28.23 | 45.83  | 66.67  |
| T0878-D1                | 344 | 258.2  | 10.17   | 16.28 | 22.06 | 35.29  | 9.30          | 15.70 | 32.35 | 41.18  | 28.78             | 44.19 | 67.65 | 79.41  | 28.78      | 44.77 | 61.76 | 61.76  | 29.94     | 43.60 | 60.29 | 67.65  | 35.47       | 54.07 | 82.35  | 88.24  |
| T0880-D2                | 157 | 1.0    | 4.46    | 1.28  | 0.00  | 0.00   | 8.28          | 0.00  | 0.00  | 0.00   | 23.57             | 24.36 | 19.35 | 13.33  | 8.28       | 10.26 | 12.90 | 13.33  | 17.20     | 10.26 | 9.68  | 6.67   | 31.21       | 35.90 | 48.39  | 60.00  |
| T0886-D1                | 69  | 833.4  | 18.84   | 35.29 | 53.85 | 66.67  | 15.94         | 32.35 | 61.54 | 66.67  | 39.13             | 61.76 | 53.85 | 66.67  | 31.88      | 35.29 | 37.70 | 50.00  | 28.99     | 29.41 | 53.85 | 50.00  | 39.13       | 61.76 | 84.62  | 100.00 |
| T0886-D2                | 127 | 821.0  | 18.90   | 33.33 | 36.00 | 50.00  | 14.17         | 28.57 | 72.00 | 91.67  | 42.52             | 58.73 | 80.00 | 91.67  | 32.28      | 50.79 | 72.00 | 91.67  | 37.80     | 52.38 | 80.00 | 100.00 | 45.67       | 65.08 | 88.00  | 100.00 |
| T0888-D1                | 121 | 1.0    | 6.61    | 10.00 | 8.33  | 16.67  | 9.92          | 13.33 | 20.83 | 16.67  | 12.40             | 16.67 | 16.67 | 16.67  | 9.92       | 10.00 | 8.33  | 8.33   | 13.22     | 20.00 | 25.00 | 25.00  | 14.88       | 18.33 | 33.33  | 50.00  |
| T0890-D2                | 106 | 23.5   | 7.55    | 9.43  | 9.52  | 0.00   | 1.89          | 1.89  | 4.76  | 10.00  | 11.32             | 15.09 | 14.29 | 30.00  | 10.38      | 11.32 | 19.05 | 20.00  | 10.38     | 16.98 | 28.57 | 40.00  | 17.92       | 30.19 | 47.62  | 60.00  |
| T0892-D2                | 110 | 159.5  | 4.55    | 7.27  | 13.64 | 18.18  | 3.64          | 7.27  | 18.18 | 27.27  | 10.00             | 14.55 | 31.82 | 54.55  | 3.64       | 3.64  | 9.09  | 18.18  | 8.18      | 14.55 | 27.27 | 54.55  | 10.91       | 16.36 | 31.82  | 45.45  |
| T0894-D1                | 89  | 83.4   | 10.11   | 9.09  | 5.88  | 12.50  | 1.12          | 2.27  | 5.88  | 12.50  | 29.21             | 36.36 | 41.18 | 50.00  | 26.97      | 31.82 | 41.18 | 37.50  | 20.22     | 22.73 | 35.29 | 62.50  | 46.07       | 77.27 | 94.12  | 100.00 |
| T0896-D3                | 161 | 7.0    | 3.73    | 3.75  | 6.25  | 12.50  | 8.07          | 0.00  | 0.00  | 0.00   | 7.45              | 13.75 | 21.88 | 37.50  | 1.86       | 1.25  | 0.00  | 0.00   | 3.73      | 6.25  | 3.13  | 6.25   | 7.45        | 3.75  | 0.00   | 0.00   |
| T0897-D1                | 138 | 19.3   | 4.35    | 5.80  | 3.70  | 0.00   | 5.80          | 7.25  | 3.70  | 7.69   | 8.70              | 10.14 | 14.81 | 15.38  | 10.87      | 11.59 | 11.11 | 7.69   | 7.97      | 7.25  | 7.41  | 7.69   | 9.42        | 8.70  | 11.11  | 7.69   |
| T0897-D2                | 124 | 27.3   | 11.29   | 12.90 | 16.67 | 25.00  | 4.03          | 3.23  | 4.17  | 0.00   | 23.39             | 33.87 | 54.17 | 50.00  | 23.39      | 24.19 | 33.33 | 41.67  | 16.94     | 27.42 | 37.50 | 50.00  | 22.58       | 33.87 | 58.33  | 83.33  |
| T0898-D1                | 106 | 30.0   | 4.72    | 5.66  | 4.76  | 10.00  | 0.94          | 1.89  | 4.76  | 10.00  | 12.26             | 18.87 | 33.33 | 50.00  | 13.21      | 20.75 | 42.86 | 40.00  | 14.15     | 24.53 | 28.57 | 50.00  | 18.87       | 30.19 | 52.38  | 70.00  |
| T0899-D1                | 259 | 1047.6 | 3.47    | 3.88  | 5.88  | 8.00   | 0.00          | 0.00  | 0.00  | 0.00   | 8.49              | 10.08 | 13.73 | 12.00  | 8.49       | 13.18 | 19.61 | 24.00  | 8.49      | 10.85 | 9.80  | 8.00   | 10.42       | 17.83 | 31.37  | 28.00  |
| T0899-D2                | 88  | 210.7  | 7.95    | 4.55  | 5.88  | 12.50  | 4.55          | 4.55  | 5.88  | 0.00   | 12.50             | 18.18 | 35.29 | 37.50  | 10.23      | 15.91 | 35.29 | 62.50  | 27.27     | 40.91 | 47.06 | 37.50  | 26.14       | 40.91 | 47.06  | 50.00  |
| T0900-D1                | 102 | 9.0    | 7.84    | 15.69 | 10.00 | 0.00   | 1.96          | 3.92  | 0.00  | 0.00   | 21.57             | 29.41 | 25.00 | 40.00  | 16.67      | 23.53 | 15.00 | 20.00  | 17.65     | 27.45 | 40.00 | 50.00  | 19.61       | 23.53 | 20.00  | 30.00  |
| T0901-D2                | 70  | 496.5  | 17.14   | 20.00 | 35.71 | 28.57  | 20.00         | 11.43 | 14.29 | 0.00   | 4.29              | 2.86  | 7.14  | 0.00   | 11.43      | 14.29 | 14.29 | 28.57  | 18.57     | 34.29 | 64.29 | 85.71  | 28.57       | 54.29 | 71.43  | 85.71  |
| T0904-D1                | 251 | 34.3   | 2.79    | 3.20  | 2.00  | 4.00   | 2.79          | 4.00  | 8.00  | 8.00   | 16.73             | 27.20 | 40.00 | 52.00  | 13.15      | 24.00 | 40.00 | 56.00  | 18.33     | 28.00 | 40.00 | 60.00  | 20.32       | 40.80 | 74.00  | 80.00  |
| T0905-D1                | 242 | 4967.3 | 7.44    | 10.74 | 18.75 | 33.33  | 4.55          | 2.48  | 4.17  | 8.33   | 11.98             | 16.53 | 29.17 | 37.50  | 11.57      | 17.36 | 27.08 | 33.33  | 10.33     | 18.18 | 25.00 | 41.67  | 13.22       | 21.49 | 29.17  | 37.50  |
| T0905-D2                | 66  | 341.1  | 15.15   | 21.21 | 23.08 | 33.33  | 16.67         | 12.12 | 7.69  | 16.67  | 15.15             | 18.18 | 23.08 | 16.67  | 12.12      | 15.15 | 23.08 | 16.67  | 18.18     | 36.36 | 61.54 | 83.33  | 34.85       | 54.55 | 61.54  | 83.33  |
| T0912-D3                | 103 | 619.7  | 13.59   | 15.69 | 15.00 | 30.00  | 15.53         | 23.53 | 40.00 | 40.00  | 30.10             | 49.02 | 65.00 | 90.00  | 24.27      | 35.29 | 65.00 | 70.00  | 33.01     | 54.90 | 75.00 | 90.00  | 31.07       | 47.06 | 75.00  | 90.00  |
| T0914-D1                | 158 | 43.3   | 8.86    | 8.86  | 16.13 | 33.33  | 2.53          | 0.00  | 0.00  | 0.00   | 20.25             | 30.38 | 32.26 | 33.33  | 24.05      | 35.44 | 51.61 | 40.00  | 24.05     | 36.71 | 67.74 | 93.33  | 27.22       | 45.57 | 77.42  | 93.33  |
| T0914-D2                | 162 | 20.0   | 6.79    | 9.88  | 6.25  | 6.25   | 0.62          | 1.23  | 3.13  | 6.25   | 24.07             | 40.74 | 65.63 | 81.25  | 22.22      | 34.57 | 59.38 | 68.75  | 29.63     | 45.68 | 56.25 | 75.00  | 27.78       | 38.27 | 75.00  | 81.25  |
| T0915-D1                | 154 | 17.0   | 7.14    | 7.79  | 10.00 | 20.00  | 1.95          | 3.90  | 6.67  | 13.33  | 20.13             | 27.27 | 33.33 | 33.33  | 20.13      | 28.57 | 43.33 | 46.67  | 20.78     | 33.77 | 40.00 | 60.00  | 22.73       | 36.36 | 63.33  | 73.33  |
| T0918-D1                | 108 | 2827.4 | 17.59   | 29.63 | 42.86 | 60.00  | 15.74         | 16.67 | 42.86 | 50.00  | 28.70             | 46.30 | 80.95 | 80.00  | 27.78      | 40.74 | 66.67 | 60.00  | 39.81     | 64.81 | 90.48 | 90.00  | 36.11       | 57.41 | 90.48  | 100.00 |
| T0918-D2                | 123 | 731.8  | 15.45   | 22.95 | 37.50 | 50.00  | 8.94          | 18.03 | 33.33 | 58.33  | 36.59             | 54.10 | 83.33 | 91.67  | 31.71      | 55.74 | 79.17 | 91.67  | 43.90     | 70.49 | 91.67 | 100.00 | 40.65       | 67.21 | 95.83  | 100.00 |
| T0918-D3                | 118 | 2853.2 | 20.34   | 33.90 | 43.48 | 63.64  | 9.32          | 18.64 | 47.83 | 81.82  | 32.20             | 52.54 | 78.26 | 90.91  | 34.75      | 64.41 | 82.61 | 90.91  | 36.44     | 71.19 | 82.61 | 90.91  | 36.44       | 67.80 | 86.96  | 90.91  |
| T0923-D1                | 286 | 6.0    | 4.20    | 2.10  | 1.75  | 3.57   | 0.35          | 0.70  | 1.75  | 3.57   | 21.68             | 27.97 | 33.33 | 39.29  | 25.52      | 39.16 | 56.14 | 60.71  | 31.82     | 51.05 | 66.67 | 89.29  | 32.87       | 55.94 | 78.95  | 100.00 |
| T0941-D1                | 341 | 2.0    | 7.62    | 7.65  | 7.35  | 14.71  | 9.38          | 12.94 | 7.35  | 8.82   | 35.48             | 44.12 | 55.88 | 64.71  | 29.62      | 42.94 | 61.76 | 73.53  | 37.83     | 51.76 | 60.29 | 52.94  | 27.86       | 40.00 | 54.41  | 52.94  |
| T0946-D1                | 80  | 123.7  | 18.75   | 22.50 | 37.50 | 62.50  | 22.50         | 27.50 | 50.00 | 75.00  | 36.25             | 55.00 | 93.75 | 100.00 | 25.00      | 40.00 | 62.50 | 87.50  | 46.25     | 62.50 | 93.75 | 100.00 | 41.25       | 60.00 | 81.25  | 75.00  |
| average                 |     |        | 9.98    | 13.95 | 18.86 | 25.31  | 7.11          | 9.53  | 18.06 | 22.49  | 19.79             | 28.59 | 39.00 | 45.60  | 18.23      | 26.12 | 36.27 | 42.65  | 20.89     | 31.90 | 43.92 | 53.72  | 25.28       | 39.52 | 56.83  | 66.54  |
