# Supplementary material
Source: PubMed Central journal article supplement (PMC5871922)
Supplement: NIHMS928798-supplement-Supp_FigS3.pdf [file NIHMS928798-supplement-Supp_FigS3.pdf]

| 3Dmodel  | CCMpred |        |       | MetaPSICOV |       |       |       | RX_submit |       | RX_rebuild |       | RX_postdict |       | RX_TBM |       | Baker_server |       | Zhang_server |       | Baker_human |       | Zhang_human |       |
|----------|---------|--------|-------|------------|-------|-------|-------|-----------|-------|------------|-------|-------------|-------|--------|-------|--------------|-------|--------------|-------|-------------|-------|-------------|-------|
|          | targets | len    | meff  | Top1       | Best5 | Top1  | Best5 | Top1      | Best5 | Top1       | Best5 | Top1        | Best5 | Top1   | Best5 | Top1         | Best5 | Top1         | Best5 | Top1        | Best5 | Top1        | Best5 |
| T0859-D1 | 113     | 1.0    | 0.237 | 0.248      | 0.204 | 0.265 | 0.242 | 0.242     | 0.212 | 0.222      | 0.227 | 0.227       | 0.246 | N/A    | 0.203 | 0.273        | 0.268 | 0.268        | 0.203 | 0.273       | 0.244 | 0.267       |       |
| T0862-D1 | 93      | 22.3   | 0.232 | 0.311      | 0.333 | 0.333 | 0.269 | 0.337     | 0.385 | 0.466      | 0.489 | 0.489       | 0.44  | N/A    | 0.467 | 0.487        | 0.462 | 0.530        | 0.481 | 0.481       | 0.387 | 0.528       |       |
| T0863-D1 | 193     | 52.0   | 0.232 | 0.232      | 0.196 | 0.248 | 0.263 | 0.263     | 0.240 | 0.247      | 0.498 | 0.498       | 0.192 | N/A    | 0.234 | 0.343        | 0.266 | 0.301        | 0.314 | 0.314       | 0.302 | 0.307       |       |
| T0863-D2 | 356     | 74.5   | 0.154 | 0.154      | 0.142 | 0.178 | 0.163 | 0.163     | 0.173 | 0.173      | 0.218 | 0.229       | 0.178 | N/A    | 0.253 | 0.253        | 0.157 | 0.190        | 0.254 | 0.254       | 0.181 | 0.208       |       |
| T0864-D1 | 246     | 209.1  | 0.267 | 0.274      | 0.353 | 0.353 | 0.353 | 0.353     | 0.310 | 0.327      | 0.609 | 0.644       | 0.178 | N/A    | 0.371 | 0.395        | 0.210 | 0.334        | 0.314 | 0.52        | 0.328 | 0.359       |       |
| T0866-D1 | 104     | 3383.6 | 0.414 | 0.414      | 0.551 | 0.597 | 0.551 | 0.597     | 0.581 | 0.606      | 0.582 | 0.582       | 0.48  | N/A    | 0.794 | 0.806        | 0.509 | 0.539        | 0.794 | 0.806       | 0.495 | 0.708       |       |
| T0869-D1 | 104     | 19.0   | 0.218 | 0.265      | 0.441 | 0.441 | 0.404 | 0.453     | 0.356 | 0.447      | 0.630 | 0.699       | 0.26  | N/A    | 0.327 | 0.374        | 0.313 | 0.428        | 0.327 | 0.374       | 0.344 | 0.437       |       |
| T0870-D1 | 123     | 58.2   | 0.228 | 0.228      | 0.282 | 0.311 | 0.314 | 0.331     | 0.264 | 0.308      | 0.476 | 0.486       | 0.326 | N/A    | 0.297 | 0.412        | 0.223 | 0.421        | 0.297 | 0.412       | 0.213 | 0.412       |       |
| T0878-D1 | 344     | 258.2  | 0.215 | 0.227      | 0.199 | 0.210 | 0.242 | 0.246     | 0.223 | 0.336      | 0.415 | 0.424       | 0.259 | N/A    | 0.302 | 0.404        | 0.279 | 0.387        | 0.302 | 0.404       | 0.272 | 0.272       |       |
| T0880-D2 | 157     | 1.0    | 0.169 | 0.172      | 0.171 | 0.201 | 0.202 | 0.209     | 0.206 | 0.213      | 0.316 | 0.458       | 0.202 | N/A    | 0.227 | 0.245        | 0.231 | 0.267        | 0.451 | 0.456       | 0.232 | 0.232       |       |
| T0886-D1 | 69      | 833.4  | 0.336 | 0.336      | 0.350 | 0.350 | 0.412 | 0.412     | 0.429 | 0.429      | 0.498 | 0.498       | 0.246 | N/A    | 0.269 | 0.269        | 0.376 | 0.376        | 0.614 | 0.676       | 0.359 | 0.359       |       |
| T0886-D2 | 127     | 821.0  | 0.247 | 0.247      | 0.238 | 0.346 | 0.350 | 0.451     | 0.288 | 0.454      | 0.334 | 0.555       | 0.184 | N/A    | 0.432 | 0.542        | 0.555 | 0.555        | 0.67  | 0.675       | 0.565 | 0.565       |       |
| T0888-D1 | 121     | 1.0    | 0.177 | 0.202      | 0.191 | 0.198 | 0.164 | 0.188     | 0.206 | 0.206      | 0.180 | 0.215       | 0.21  | N/A    | 0.209 | 0.258        | 0.272 | 0.274        | 0.539 | 0.582       | 0.272 | 0.31        |       |
| T0890-D2 | 106     | 23.5   | 0.202 | 0.265      | 0.240 | 0.319 | 0.243 | 0.247     | 0.421 | 0.423      | 0.344 | 0.381       | 0.257 | N/A    | 0.263 | 0.429        | 0.284 | 0.311        | 0.263 | 0.429       | 0.308 | 0.349       |       |
| T0892-D2 | 110     | 159.5  | 0.277 | 0.277      | 0.340 | 0.446 | 0.278 | 0.363     | 0.238 | 0.281      | 0.347 | 0.365       | 0.444 | N/A    | 0.342 | 0.453        | 0.506 | 0.506        | 0.455 | 0.486       | 0.492 | 0.492       |       |
| T0894-D1 | 89      | 83.4   | 0.196 | 0.245      | 0.199 | 0.242 | 0.192 | 0.280     | 0.175 | 0.218      | 0.309 | 0.309       | 0.45  | N/A    | 0.564 | 0.564        | 0.568 | 0.568        | 0.564 | 0.564       | 0.595 | 0.595       |       |
| T0896-D3 | 161     | 7.0    | 0.118 | 0.131      | 0.145 | 0.153 | 0.109 | 0.121     | 0.122 | 0.155      | 0.155 | 0.191       | 0.151 | N/A    | 0.168 | 0.185        | 0.207 | 0.207        | 0.168 | 0.185       | 0.19  | 0.23        |       |
| T0897-D1 | 138     | 19.3   | 0.205 | 0.215      | 0.199 | 0.203 | 0.163 | 0.179     | 0.195 | 0.221      | 0.217 | 0.237       | 0.279 | N/A    | 0.198 | 0.240        | 0.258 | 0.258        | 0.19  | 0.24        | 0.243 | 0.269       |       |
| T0897-D2 | 124     | 27.3   | 0.188 | 0.206      | 0.228 | 0.258 | 0.161 | 0.195     | 0.173 | 0.224      | 0.232 | 0.281       | 0.191 | N/A    | 0.221 | 0.255        | 0.608 | 0.608        | 0.265 | 0.265       | 0.603 | 0.603       |       |
| T0898-D1 | 106     | 30.0   | 0.263 | 0.271      | 0.289 | 0.307 | 0.289 | 0.354     | 0.395 | 0.400      | 0.372 | 0.598       | 0.291 | N/A    | 0.330 | 0.330        | 0.375 | 0.388        | 0.33  | 0.33        | 0.357 | 0.401       |       |
| T0899-D1 | 259     | 1047.6 | 0.228 | 0.228      | 0.276 | 0.278 | 0.250 | 0.284     | 0.302 | 0.311      | 0.520 | 0.524       | 0.621 | N/A    | 0.456 | 0.467        | 0.498 | 0.595        | 0.456 | 0.467       | 0.537 | 0.624       |       |
| T0899-D2 | 88      | 210.7  | 0.163 | 0.163      | 0.207 | 0.232 | 0.231 | 0.271     | 0.209 | 0.211      | 0.246 | 0.256       | 0.27  | N/A    | 0.240 | 0.251        | 0.166 | 0.175        | 0.24  | 0.251       | 0.264 | 0.296       |       |
| T0900-D1 | 102     | 3.0    | 0.158 | 0.158      | 0.298 | 0.298 | 0.206 | 0.248     | 0.216 | 0.250      | 0.259 | 0.261       | 0.304 | N/A    | 0.489 | 0.489        | 0.445 | 0.479        | 0.515 | 0.515       | 0.45  | 0.573       |       |
| T0901-D2 | 70      | 496.5  | 0.177 | 0.191      | 0.183 | 0.221 | 0.214 | 0.229     | 0.224 | 0.244      | 0.254 | 0.284       | 0.501 | N/A    | 0.197 | 0.225        | 0.184 | 0.426        | 0.197 | 0.212       | 0.528 | 0.528       |       |
| T0904-D1 | 251     | 34.3   | 0.190 | 0.221      | 0.385 | 0.385 | 0.315 | 0.351     | 0.244 | 0.304      | 0.656 | 0.688       | 0.466 | N/A    | 0.480 | 0.483        | 0.464 | 0.464        | 0.474 | 0.48        | 0.461 | 0.474       |       |
| T0905-D1 | 242     | 4967.3 | 0.434 | 0.452      | 0.477 | 0.505 | 0.408 | 0.408     | 0.499 | 0.499      | 0.547 | 0.547       | 0.644 | N/A    | 0.623 | 0.623        | 0.531 | 0.591        | 0.657 | 0.669       | 0.631 | 0.66        |       |
| T0905-D2 | 66      | 341.1  | 0.166 | 0.207      | 0.227 | 0.236 | 0.243 | 0.377     | 0.266 | 0.288      | 0.241 | 0.365       | 0.566 | N/A    | 0.207 | 0.218        | 0.163 | 0.548        | 0.233 | 0.233       | 0.441 | 0.572       |       |
| T0912-D3 | 103     | 619.7  | 0.186 | 0.218      | 0.234 | 0.248 | 0.234 | 0.248     | 0.330 | 0.330      | 0.269 | 0.304       | 0.177 | N/A    | 0.134 | 0.219        | 0.162 | 0.414        | 0.435 | 0.435       | 0.2   | 0.273       |       |
| T0914-D1 | 158     | 43.3   | 0.172 | 0.233      | 0.237 | 0.293 | 0.254 | 0.263     | 0.256 | 0.256      | 0.258 | 0.333       | 0.199 | N/A    | 0.322 | 0.322        | 0.324 | 0.328        | 0.322 | 0.322       | 0.328 | 0.328       |       |
| T0914-D2 | 162     | 20.0   | 0.213 | 0.213      | 0.187 | 0.187 | 0.306 | 0.306     | 0.247 | 0.247      | 0.276 | 0.276       | 0.246 | N/A    | 0.373 | 0.373        | 0.343 | 0.343        | 0.373 | 0.373       | 0.335 | 0.374       |       |
| T0915-D1 | 154     | 17.0   | 0.254 | 0.279      | 0.283 | 0.321 | 0.441 | 0.492     | 0.501 | 0.540      | 0.507 | 0.560       | 0.538 | N/A    | 0.556 | 0.556        | 0.526 | 0.633        | 0.543 | 0.552       | 0.549 | 0.585       |       |
| T0918-D1 | 108     | 2827.4 | 0.195 | 0.248      | 0.249 | 0.264 | 0.395 | 0.455     | 0.365 | 0.365      | 0.264 | 0.428       | 0.416 | N/A    | 0.170 | 0.377        | 0.485 | 0.513        | 0.492 | 0.493       | 0.494 | 0.494       |       |
| T0918-D2 | 123     | 731.8  | 0.197 | 0.245      | 0.255 | 0.255 | 0.317 | 0.349     | 0.232 | 0.459      | 0.304 | 0.304       | 0.395 | N/A    | 0.172 | 0.252        | 0.403 | 0.426        | 0.568 | 0.568       | 0.433 | 0.472       |       |
| T0918-D3 | 118     | 2853.2 | 0.201 | 0.201      | 0.242 | 0.248 | 0.344 | 0.419     | 0.310 | 0.329      | 0.247 | 0.293       | 0.409 | N/A    | 0.569 | 0.625        | 0.465 | 0.465        | 0.599 | 0.602       | 0.467 | 0.467       |       |
| T0923-D1 | 286     | 6.0    | 0.165 | 0.187      | 0.208 | 0.268 | 0.194 | 0.211     | 0.238 | 0.238      | 0.224 | 0.276       | 0.193 | N/A    | 0.225 | 0.225        | 0.242 | 0.253        | 0.225 | 0.225       | 0.253 | 0.253       |       |
| T0941-D1 | 341     | 2.0    | 0.139 | 0.155      | 0.225 | 0.236 | 0.191 | 0.221     | 0.232 | 0.259      | 0.194 | 0.216       | 0.183 | N/A    | 0.188 | 0.222        | 0.235 | 0.235        | 0.188 | 0.222       | 0.224 | 0.224       |       |
| T0946-D1 | 80      | 123.7  | 0.163 | 0.172      | 0.239 | 0.268 | 0.244 | 0.253     | 0.292 | 0.417      | 0.394 | 0.394       | 0.259 | N/A    | 0.187 | 0.264        | 0.261 | 0.354        | 0.187 | 0.264       | 0.28  | 0.45        |       |

Average 0.216 0.235 0.262 0.289 0.274 0.307 0.285 0.322 0.354 0.397 0.320 N/A 0.326 0.370 0.347 0.404 0.392 0.422 0.375 0.420

This page lists the quality (TMscore) of the 3D models generated by a few methods on the CASP12 hard targets.

Top1 and Top5 refer to the first submitted models and the best of top 5 submitted models, respectively.

- RX\_submit** The 3D models submitted to CASP12, generated by the RaptorX\_Contact group during CASP12 from top L predicted contacts.
- RX\_rebuild** The 3D models were generated from predicted contacts submitted to CASP12 by the RaptorX-Contact group, but with 2L-3L top predicted contacts.
- RX\_postdict** The 3D models were generated from contacts predicted by our deep model trained right after CASP12, running on a unitprot20 sequence database dated in Feb 2016.
- RX\_TBM** The template-based 3D models submitted to CASP12 by RaptorX, which do not use any predicted contacts. Usually only one 3D model was submitted for each target.

**metaPSICOV** the latest version v1.04 of metaPSICOV released at 27-Sep-2016  
The 3D models for CCMpred and MetaPSICOV were generated locally by feeding their predicted contacts and our predicted secondary structure to CNS.

The 3D models for Baker\_server, Baker\_human, Zhang\_server and Zhang\_human were downloaded from the CASP12 web site.
